# Supplementary material for: Split spawning increases robustness of coral larval supply and inter-reef connectivity
Source: PubMed Central journal article supplement (PMC6671964; doi:10.1038/s41467-019-11367-7), 2019-08-01
Supplement: 41467_2019_11367_MOESM1_ESM.pdf [file 41467_2019_11367_MOESM1_ESM.pdf]

## **Supplementary Information for:**

**Hock et al. "Split spawning increases robustness of coral larval supply and inter-reef connectivity"**

## Supplementary Tables

**Supplementary Table 1.** Timing of larvae releases in dispersal simulations designed to represent the mass coral spawning events on the GBR.

| Year | Month    | Day | DAFM | Sector | Reference                                                        |
|------|----------|-----|------|--------|------------------------------------------------------------------|
| 2008 | November | 18  | 5    | N      | Andrew Baird – pers. comm.                                       |
| 2008 | November | 18  | 5    | C      | <sup>4</sup>                                                     |
| 2008 | December | 15  | 3    | C      | <sup>5</sup>                                                     |
| 2008 | December | 15  | 3    | S      | Inferred                                                         |
|      |          |     |      |        |                                                                  |
| 2010 | October  | 28  | 5    | N      | Inferred                                                         |
| 2010 | October  | 28  | 5    | C      | <sup>6 7</sup>                                                   |
| 2010 | November | 26  | 4    | N      | <sup>8</sup> ; Andrew Baird – pers. comm.                        |
| 2010 | November | 29  | 8    | S      | <sup>9</sup>                                                     |
| 2010 | November | 30  | 9    | C      | <sup>6 10</sup>                                                  |
|      |          |     |      |        |                                                                  |
| 2011 | October  | 17  | 5    | N      | Inferred                                                         |
| 2011 | November | 15  | 5    | N      | <sup>8,11</sup> ; Andrew Baird – pers. comm.                     |
| 2011 | November | 16  | 6    | C      | <sup>10</sup>                                                    |
| 2011 | November | 17  | 7    | S      | Matthew Nitschke – pers. comm.                                   |
|      |          |     |      |        |                                                                  |
| 2012 | October  | 9   | 9    | N      | Inferred                                                         |
| 2012 | October  | 9   | 9    | C      | Inferred                                                         |
| 2012 | November | 5   | 5    | N      | Andrew Baird – pers. comm.                                       |
| 2012 | November | 8   | 6    | C      | Inferred                                                         |
| 2012 | November | 9   | 11   | S      | Eugenia Sampayo, Matthew Nitschke – pers. comm.                  |
| 2012 | December | 5   | 7    | S      | Eugenia Sampayo – pers. comm.                                    |
|      |          |     |      |        |                                                                  |
| 2014 | October  | 11  | 5    | N      | Inferred                                                         |
| 2014 | November | 12  | 8    | N      | Andrew Baird - pers. comm.                                       |
| 2014 | November | 12  | 8    | C      | <sup>12</sup>                                                    |
| 2014 | November | 14  | 10   | S      | Luis Gómez-Lemos - pers. comm.                                   |
| 2014 | December | 11  | 7    | C      | GBRMPA - Eye on the Reef - in situ; Gerard Ricardo – pers. comm. |
| 2014 | December | 12  | 8    | S      | Inferred                                                         |
|      |          |     |      |        |                                                                  |
| 2015 | November | 2   | 6    | N      | Inferred                                                         |
| 2015 | November | 2   | 6    | C      | GBRMPA - Eye on the Reef - in situ                               |
| 2015 | November | 5   | 5    | S      | Luis Gómez-Lemos - pers. comm.                                   |
| 2015 | November | 30  | 4    | N      | Rachel Woods - pers. comm.                                       |
| 2015 | November | 30  | 4    | C      | GBRMPA - Eye on the Reef - in situ                               |
| 2015 | November | 30  | 4    | S      | Inferred                                                         |
| 2016 | November | 17  | 3    | N      | Inferred                                                         |
| 2016 | November | 17  | 3    | C      | GBRMPA - Eye on the Reef - in situ                               |
| 2016 | December | 20  | 6    | N      | Rachel Woods - pers. comm.                                       |
| 2016 | December | 20  | 6    | C      | Inferred                                                         |
| 2016 | December | 20  | 6    | S      | Inferred                                                         |

Larvae releases in dispersal simulations were based on listed timings of *Acropora* spawning. Inferred release dates are based on the full moon cycle for the given region <sup>1-3</sup>. DAFM = days after full moon.

**Supplementary Table 2.** Sensitivity of connectivity metrics to the definition of the latitudinal spawning sector boundaries.

| <b>Metric</b>                            | <b>Minimum value for any definition of latitudinal sector</b> | <b>Maximum value for any definition of latitudinal sector</b> | <b>Percent difference (max/min)</b> |
|------------------------------------------|---------------------------------------------------------------|---------------------------------------------------------------|-------------------------------------|
| Mean supply                              | 0.0204                                                        | 0.0206                                                        | 1.2%                                |
| Mean number of sources                   | 10.5597                                                       | 11.2984                                                       | 7%                                  |
| Mean years of supply failure             | 1.4367                                                        | 1.5126                                                        | 5.3%                                |
| Mean consecutive years of supply failure | 1.2383                                                        | 1.3255                                                        | 7.1%                                |

The minimum and maximum values correspond to the GBR-wide means for the respective metrics for any of the 9 definitions of latitudinal spawning sectors. The percent difference shows the discrepancy between the minimum and maximum value.

## Supplementary Figures

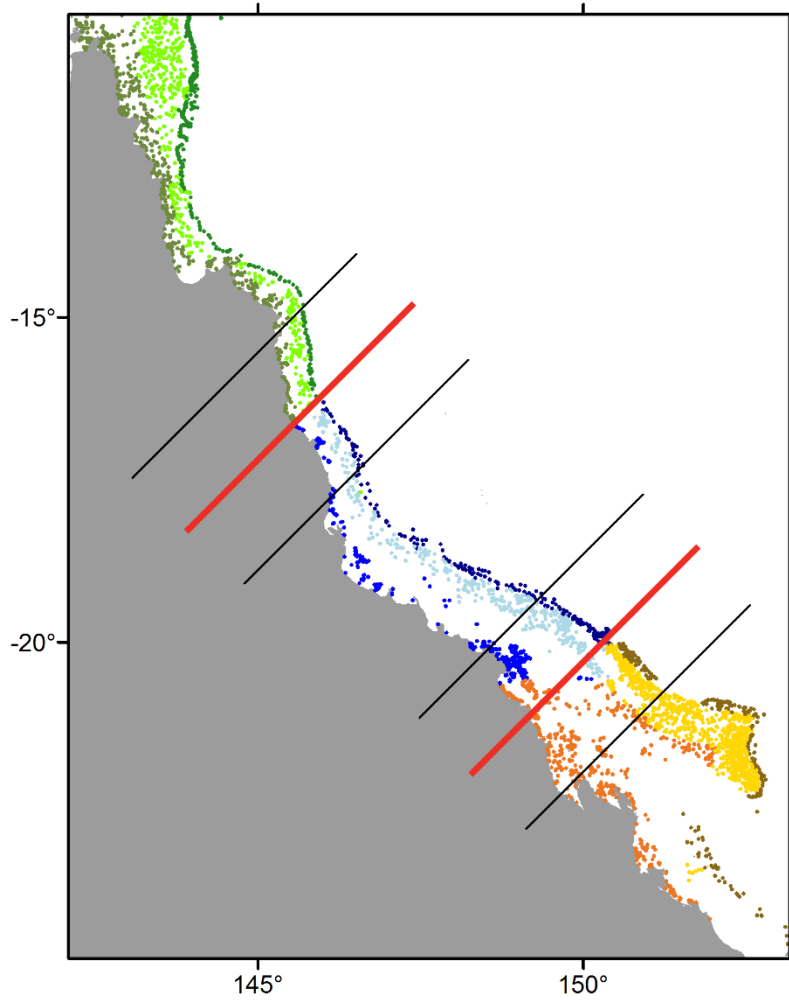

**Supplementary Figure 1.** Latitudinal sector boundaries tested in the sensitivity analysis. The distance between the upper and lower boundaries for a northern/southern set is 125km. The boundaries used in subsequent analysis and figures are shown as thick red lines.

## References used in the Supplementary Material

- 1 Babcock, R. C. *et al.* Synchronous spawnings of 105 scleractinian coral species on the Great Barrier Reef. *Mar. Biol.* **90**, 379-394 (1986).
- 2 Harrison, P. L. *et al.* Mass spawning in tropical reef corals. *Science* **223**, 1186-1189 (1984).
- 3 Willis, B., Babcock, R., Harrison, P., Oliver, J. & Wallace, C. in *Proceedings of the 5th International Coral Reef Congress*. 343-348 (International Coral Reef Society, 1985).
- 4 Cumbo, V., Fan, T.-Y. & Edmunds, P. Scleractinian corals capture zooplankton within days of settlement and metamorphosis. *Coral Reefs* **31**, 1155-1155 (2012).
- 5 Graham, E. M., Baird, A. H., Connolly, S. R., Sewell, M. A. & Willis, B. L. Rapid declines in metabolism explain extended coral larval longevity. *Coral Reefs* **32**, 539-549 (2013).
- 6 Chua, C.-M., Leggat, W., Moya, A. & Baird, A. H. Near-future reductions in pH will have no consistent ecological effects on the early life-history stages of reef corals. *Mar. Ecol. Prog. Ser.* **486**, 143-151 (2013).
- 7 Palmer, C. V., Graham, E. M. & Baird, A. H. Immunity through early development of coral larvae. *Dev. Comp. Immunol.* **38**, 395-399 (2012).
- 8 Trapon, M. L., Pratchett, M. S., Hoey, A. S. & Baird, A. H. Influence of fish grazing and sedimentation on the early post-settlement survival of the tabular coral *Acropora cytherea*. *Coral Reefs* **32**, 1051-1059 (2013).
- 9 Doropoulos, C., Ward, S., Marshell, A., Diaz-Pulido, G. & Mumby, P. J. Interactions among chronic and acute impacts on coral recruits: the importance of size-escape thresholds. *Ecology* **93**, 2131-2138 (2012).
- 10 Siboni, N., Abrego, D., Motti, C. A., Tebben, J. & Harder, T. Gene expression patterns during the early stages of chemically induced larval metamorphosis and settlement of the coral *Acropora millepora*. *PLoS One* **9**, e91082 (2014).
- 11 Woolsey, E., Keith, S. A., Byrne, M., Schmidt-Roach, S. & Baird, A. Latitudinal variation in thermal tolerance thresholds of early life stages of corals. *Coral Reefs* **34**, 471-478 (2015).
- 12 Humanes, A., Noonan, S. H., Willis, B. L., Fabricius, K. E. & Negri, A. P. Cumulative effects of nutrient enrichment and elevated temperature compromise the early life history stages of the coral *Acropora tenuis*. *PloS ONE* **11**, e0161616 (2016).
